# Supplementary material for: Parasites influence the physiology and personality in a small mammal (Ochotona curzoniae)
Source: PeerJ. 2025 Nov 28;13:e20420. doi: 10.7717/peerj.20420 (PMC12667697; doi:10.7717/peerj.20420)
Supplement: Supplemental Information 2 [file peerj-13-20420-s002.xlsx]

## Sheet: Sheet1
Variable name	Unit	Description	Notes
Date	Day(D/d)	The experiment was divided into three stages: day 5 (D5), day 8 (D8), and day 18 (D18)	Abbreviations are D5, D8, D18
id	/	C indicates the control group; G indicates the coccidian oocyst-fed group; Q indicates the anthelmintic-fed group	Measure and assess immediately on site after capture; record the data and assign an individual identification number
sex	/	F for female, M for male
weight	g	Following capture, body weight was measured using a spring scale (with the animal in a net bag), and individuals heavier than 130 g were selected.
treatment	/	(1) Eimeria infection group (PA+), (2) a control group with normal saline gavage (Ctrl), and (3) an anticoccidial drug-treated group (PA−).	PA+ group, pikas were fed 2.0 × 10⁶ PCS/mL of Eimeria spp. oocysts. The Ctrl group received 1 mL of normal saline, while the PA− group was treated with anticoccidial drugs.
T3	nmol/L	triiodothyronine	Fecal samples were obtained immediately after excretion and maintained at −20 °C in a freezer, and the CORT, T3, and T4 concentrations were measured . Hormone (CORT, T3, and T4) concentrations were quantified using an enzyme-linked immunos orbent assay (ELISA) kit (Guangzhou Leizhi Biotechnology Co. Ltd., China).
T4	nmol/L	thyroxine
Cortisol	ng/ml	fecal cortisol (CORT) levels
RMR	ml/(g.h)	resting metabolic rate. RMR(w)=Vo2[16＋5.164RER]60	Calculate the RMR of the mouse rabbit according to the above formula, where RER (Respiratory Exchange Ratio) is the ratio of CO2 production rate (VCO2, mL CO2 min-1) to O2 consumption rate (VO2, mL O2 min-1)
Boldness	s	Once an individual quickly entered the refuge, the time it first left the refuge within two minutes was recorded as boldness. If the individual did not leave the refuge within 2 min, the boldness was considered 120 s	Across all 30 individuals tested three times each (90 trials in total), 11 trials (12.2%) resulted in the maximum latency of 120 s, indicating that most pikas exited the refuge within the test duration. Therefore, the boldness test was generally effective in capturing inter-individual differences in this species
Docility	s	Time spent by plateau pikas struggling in mesh bags as an indicator of docility in plateau pikas. Plateau pikas were placed in a 20 cm × 15 cm mesh bag, and the standing time of plateau pikas was recorded for 60 s. The standing time of plateau pikas was recorded in a mesh bag of 20 cm × 15 cm. The stationary time of the plateau pikas was recorded within 60 s.	All individuals were tested for their behavior at three different time points, with the behavioral tests conducted in the consistent order of exploration, boldness, and docility, and all behaviors were measured on the same day for each time point
Exploration	mm	the moving distance of an animal within 180 s in the open field was analyzed, indicating the exploration of pikas	The experimental videos were using an animal movement trajectory tracking system (EthoVision XT, Nodas Inc.) to obtain exploration data
Emeria spp.	oocysts	the number of oocysts per gram of feces.	ing system (EthoVision XT, Nodas Inc.) to obtain data
