# Supplementary material for: Parasites influence the physiology and personality in a small mammal (Ochotona curzoniae)
Source: PeerJ. 2025 Nov 28;13:e20420. doi: 10.7717/peerj.20420 (PMC12667697; doi:10.7717/peerj.20420)
Supplement: Supplemental Information 3 [file peerj-13-20420-s003.xlsx]

## Sheet: Sheet1
Date	id	sex	weight	treatment	T3	T4	Cortisol	RMR	Boldness	Docility	Exploration	Emeria spp
5d	G1	F	138	PA+	4.82	149.359	10.6851	2.00085	39	27	13.771	3000
5d	G2	F	131	PA+	3.505	127.24	10.3373	1.40667	5	23	205.956	2300
5d	G3	M	149	PA+	5.035	178.601	9.28312	2.43205	9	30	484.458	10300
5d	G5	F	131	PA+	4.945	160.092	8.36069	2.33121	21	41	24.7999	19010
5d	G6	F	136	PA+	3.42	161.211	10.0079	3.87806	29	41	11.1238	9900
5d	G7	M	130	PA+	5.01	164.82	7.5562	2.64644	29	2	271.717	14400
5d	G9	F	135	PA+	4.685	131.689	8.30781	2.11573	11	38	257.226	9818.33
5d	G10	F	135	PA+	3.435	156.203	6.57584	2.7776	20.4286	38	198.27	10100
5d	G11	M	149	PA+	3.805	164.571	8.889	2.36083	21	3	326.581	10100
5d	G14	F	144	PA+	4.92	125.125	8.821	2.53587	29	12	188.76	12221.4
5d	Q2	F	135	PA-	5.42964	151.405	8.43799	0.0601219	40	9	840.363	0
5d	Q3	F	147	PA-	6.161	144.536	7.13532	2.0446	7	29	60.0086	0
5d	Q4	F	131	PA-	5.44916	166.447	10.2385	1.94989	4	17	73.7173	200
5d	Q6	F	131	PA-	5.12653	150.852	10.2385	0.0413944	3	23	800.802	11600
5d	Q7	M	140	PA-	6.39178	169.93	11.7539	2.86843	17	0	441.335	6200
5d	Q9	F	132	PA-	5.00253	207.762	11.0855	2.3408	45	48	854.741	3033
5d	Q11	F	147	PA-	6.60763	174.944	7.65424	2.35286	7	3	3.18e-08	3505.5
5d	Q12	F	133	PA-	5.5456	205.743	11.641	0.95331	17.5714	23	240.169	1616.5
5d	Q13	F	144	PA-	5.99452	164.916	9.889	1.66188	7	15	50.3822	0
5d	Q15	M	150.5	PA-	6.83152	173.088	9.821	1.36685	7	40	373.5	4700
5d	C1	F	132	Ctrl	2.37443	79.2908	7.94948	2.41292	120	1	8.26199	2600
5d	C2	F	132	Ctrl	3.27917	68.4167	9.31729	2.34667	6	7	571.849	300
5d	C3	F	130.9	Ctrl	3.01165	80.8536	5.98871	0.078638	120	16	323.527	0
5d	C4	F	135	Ctrl	3.58971	92.9649	10.2056	2.40341	7	43	769.892	7800
5d	C5	F	138	Ctrl	2.3	95.229	6.84526	2.986	6	6	6.7005	10200
5d	C6	M	169	Ctrl	3.395	93.6736	6.37977	3.03078	65	7	42.7244	300
5d	C7	M	143	Ctrl	2.59	107.766	9.5496	2.43552	12	4	548.801	3533.33
5d	C8	M	144	Ctrl	3.35	94.5757	6.6412	2.58943	48	6	14.7257	1450
5d	C11	F	135	Ctrl	3.09	86.4562	10.889	1.32032	12	39	2693.04	300
5d	C12	M	131	Ctrl	3.56	97.78	10.821	1.89546	120	30	145.172	3533
8d	G1	F	132.8	PA+	4.255	142.142	9.12478	2.48988	51	8	115.135	1350
8d	G2	F	130	PA+	4.205	171.166	6.24905	2.34667	30	26	384.434	1500
8d	G3	M	153	PA+	4.44	158.505	9.25216	0.078638	94	14	452.674	500
8d	G5	F	130	PA+	4.47	156.794	7.65638	2.32459	27	58	495.127	900
8d	G6	F	139	PA+	3.56	167.153	9.38242	3.88871	7	58	94.7597	1500
8d	G7	M	152	PA+	3.71	124.192	7.66886	2.95598	28	21	275.879	1900
8d	G9	F	138.2	PA+	3.72	153.528	8.22228	2.732	9	56	368.346	2900
8d	G10	F	138	PA+	3.005	137.475	7.68692	2.77226	35.1429	17	211.216	1507.14
8d	G11	M	146	PA+	3.535	158.785	7.65	2.71615	28	7	182.134	1500
8d	G14	F	133	PA+	4.375	161.118	9.2	3.42922	28	47	1730.67	1500
8d	Q2	F	146	PA-	4.505	185.259	7.29477	0.016213	28	25	14.1512	400
8d	Q3	F	147	PA-	6.61	191.014	6.05298	3.34596	39	27	161.677	100
8d	Q4	F	131	PA-	4.765	210.831	6.58168	2.60115	26	29	3.78185	1900
8d	Q6	F	132	PA-	5.35	183.05	6.25601	0.0223243	10	19	336.879	2100
8d	Q7	F	138	PA-	6.11	199.413	5.50698	3.89652	26.5	9	517.094	500
8d	Q9	F	134	PA-	5.60019	177.695	6.58171	3.36717	33.5	7	1082.87	1200
8d	Q11	F	130.5	PA-	5.81	188.245	6.37902	3.7341	57	14	289.829	18.83
8d	Q12	F	136	PA-	6.095	234.007	6.67388	1.33886	31.4286	25	747.53	888.404
8d	Q13	F	144	PA-	6.41	212.417	6.5	2.23348	28	22.71	19.2513	500
8d	Q15	M	166	PA-	5.705	203.644	6.2	3.37842	26	43	373.105	500
8d	C1	F	139	Ctrl	2.53	131.191	8.79799	0.0299774	120	8	281.545	3000
8d	C2	F	130	Ctrl	3.25	120.77	11.2162	4.06058	13	9	90.6943	400
8d	C3	F	132.5	Ctrl	3.68	137.724	10.2943	3.74657	120	22	577.016	2600
8d	C4	F	137	Ctrl	2.135	141.302	9.05676	0.0204229	120	8	7541.67	500
8d	C5	F	142	Ctrl	3.865	154.741	11.1736	3.31088	15	11	376.8	300
8d	C6	M	140.8	Ctrl	2.57	129.605	5.75811	3.48504	7	5	1514.41	450
8d	C7	M	145	Ctrl	4.195	113.521	9.38283	0.095675	20	6	1640.72	500
8d	C8	M	133	Ctrl	2.9208	156.235	10.0071	3.07299	59.2857	53	2044.53	1107.14
8d	C11	F	134	Ctrl	3.895	95.1046	10.25	1.35816	20	30	23.7971	500
8d	C12	M	138	Ctrl	4.18	127.178	11.2	2.34373	120	44	482.572	500
18d	G1	F	132	PA+	4.49407	142.142	5.5275	1.85557	120	34	304.7	100
18d	G2	F	131.6	PA+	4.81748	171.166	11.2598	1.64559	7	20	758.1	100
18d	G3	M	150	PA+	3.87532	158.505	9.15135	2.10046	120	28	538.961	0
18d	G5	F	134	PA+	4.33012	156.794	11.0528	2.87375	12	39	803.426	100
18d	G6	F	144	PA+	4.34247	167.153	8.89603	2.60619	120	60	48.6678	200
18d	G7	M	132	PA+	4.51765	124.192	11.2387	2.49676	84	45	6.23434	0
18d	G9	F	145.6	PA+	3.5373	153.528	10.7502	2.8055	8	55	267.337	100
18d	G10	F	151	PA+	3.85286	137.475	10.7177	2.38872	51	60	389.632	85.7143
18d	G11	M	144.9	PA+	5.15325	158.785	9.82426	2.65215	65.25	5	304.7	100
18d	G14	F	132	PA+	3.26779	161.118	10.734	2.38052	67.5	49	306	100
18d	Q2	F	143	PA-	5.9382	212.709	8.39363	3.20169	79	24.5	0.5	0
18d	Q3	F	130	PA-	5.78772	215.03	10.392	3.66974	24	49	2	0
18d	Q4	F	133	PA-	5.42501	210.23	8.50312	3.6456	14	36.33	30.33	0
18d	Q6	F	130	PA-	5.62602	182.056	8.92074	2.96172	24	60	9.67004	100
18d	Q7	F	148	PA-	7.16897	172.392	10.8241	2.81809	4	0	47	25
18d	Q9	F	136	PA-	6.7209	189.46	11.2816	2.35664	72	49	30.33	100
18d	Q11	F	138.8	PA-	6.67935	164.58	10.3339	2.854	24	54.5	2	2167
18d	Q12	F	132	PA-	5.4396	183.06	11.1736	3.082	14	24.5	17.4043	341.714
18d	Q13	F	131.8	PA-	5.31046	169.067	9.97783	3.109	31.875	36.33	9.67004	25
18d	Q15	M	143.5	PA-	7.1218	176.879	10.3629	3.535	24	36.33	9	0
18d	C1	F	132	Ctrl	4.1482	103.588	8.49247	2.86368	34	38	51.9603	1925
18d	C2	F	130	Ctrl	4.57941	144.438	7.63592	3.68022	46	19	84.88	100
18d	C3	F	147.2	Ctrl	5.01625	112.028	8.75602	3.25967	107	58	93.75	10
18d	C4	F	150	Ctrl	3.18357	95.1798	5.66083	3.63507	120	60	588.362	100
18d	C5	F	148	Ctrl	4.51204	111.777	6.28173	3.165	40	58	3	1050
18d	C6	M	132	Ctrl	4.28857	95.1798	9.31729	3.35849	8	28.5	52	1925
18d	C7	M	133	Ctrl	3.4834	140.61	8.73109	3.20926	107	0	47.0802	2000
18d	C8	M	130	Ctrl	4.55808	92.513	6.15831	3.646	79	50	131.576	1015.71
18d	C11	F	147	Ctrl	3.12518	81.3437	7.62921	4.03836	67.625	50	52	1050
18d	C12	M	137	Ctrl	3.47891	132.17	8.0642	3.03209	62.5	40.43	53	100
